# Supplementary material for: Photocatalytic Degradation, Anticancer, and Antibacterial Studies of Lysinibacillus sphaericus Biosynthesized Semiconductor and Hybrid Metal/Semiconductor Nanoparticles
Source: Preprints.org preprint supplement (doi:10.20944/preprints202307.0022.v1), 2023-07-03
Supplement: Supplementary file 4 [file supplementary]

**Supplementary Materials**

**Photocatalytic degradation, anticancer, and antibacterial studies of *Lysinibacillus sphaericus* biosynthesized semiconductor and hybrid metal/semiconductor nanoparticles**

**Kannan Badri Narayanana,b*, Rakesh Bhaskar, Yong Joo Seok, Sung Soo Hana,b***

aSchool of Chemical Engineering, Yeungnam University, 280 Daehak-Ro, Gyeongsan, Gyeongbuk 38541, South Korea

bResearch Institute of Cell Culture, Yeungnam University, 280 Daehak-Ro, Gyeongsan, Gyeongbuk 38541, South Korea

*Corresponding authors

Dr. Kannan Badri Narayanan, Email ID: [okbadri@gmail.com](mailto:okbadri@gmail.com), [okbadri@yu.ac.kr](mailto:okbadri@yu.ac.kr)

Prof. Sung Soo Han, Email ID: [sshan@yu.ac.kr](mailto:sshan@yu.ac.kr)


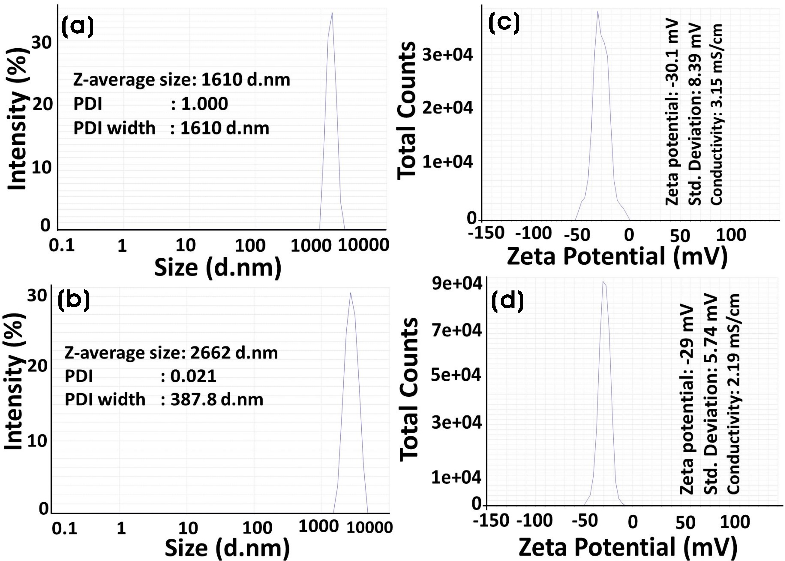


**Supplementary Figure 1**. (a, b) Dynamic light scattering (DLS) and (c, d) zeta (ζ) potentials of biosynthesized ZnO and Ag/ZnO NPs.


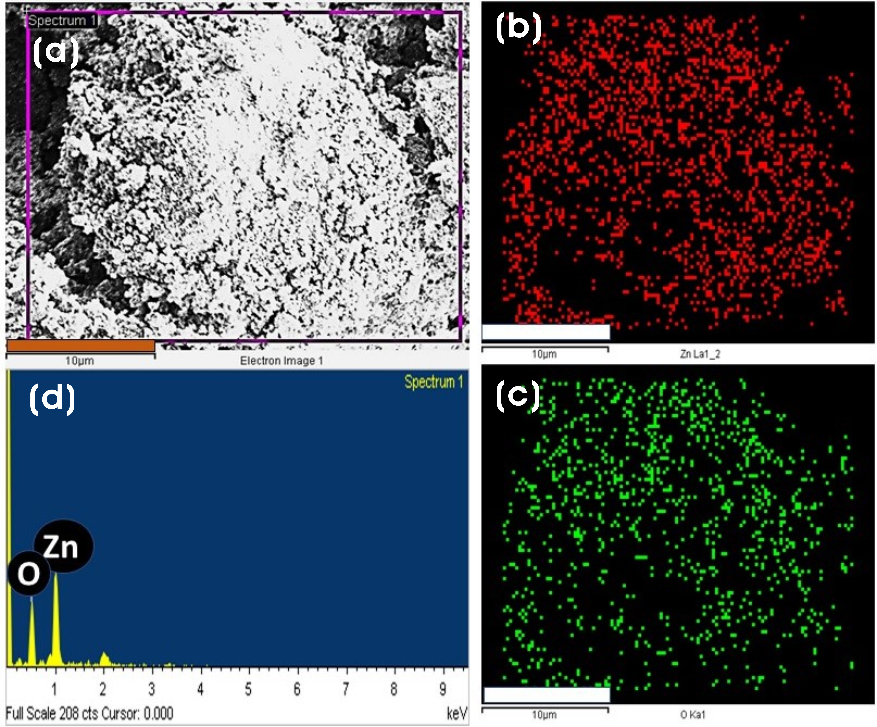


**Supplementary Figure 2.** FE-SEM-EDX analysis of ZnO. (a) FE-SEM micrograph and elemental maps of (b) Zn-L (c) O-K and (d) EDX spectrum.
